# Supplementary material for: Pretreatment mortality risk prediction model in patients with polymyositis/dermatomyositis-associated interstitial lung disease
Source: PubMed Central journal article supplement — RMD Open. 2024 Apr 24;10(2):e003850. doi: 10.1136/rmdopen-2023-003850 (PMC11043722; doi:10.1136/rmdopen-2023-003850), 2024-04-24
Supplement: rmdopen-2023-003850supp001.pdf [file rmdopen-2023-003850supp001.pdf]

## Supplementary Materials

### Supplementary Tables

**Table S1.** Treatment information.

**Table S2.** Patient Characteristics after imputation of missing values.

**Table S3.** Univariate and multivariate associations between fifteen candidates markers and rapid progression in patients with PM/DM-ILD.

### Supplementary Figures

**Figure S1.** The pattern of missing values.

**Figure S2.** The multicollinearity of final model was assessed by tolerance (A) and variance inflation factor (B).

**Figure S3.** Dominance analysis assessed the relative importance of each independent predictor within the prediction model.

**Figure S4.** Sensitivity analyses verify the model's robustness.

**Figure S5.** Comparative assessments against previous models.

**Table S1.** Treatment information.

| Treatment            | Overall<br>(N = 418) | Survivors<br>(N = 327) | Non-Survivors<br>(N = 91) | P value |
|----------------------|----------------------|------------------------|---------------------------|---------|
| Corticosteroid       | 418 (100%)           | 327 (100%)             | 91 (100%)                 | 1.000   |
| IVIG                 | 71 (17%)             | 24 (7.3%)              | 47 (52%)                  | <0.001  |
| IVCY                 | 234 (56%)            | 184 (56%)              | 50 (55%)                  | 0.822   |
| Tacrolimus           | 102 (24%)            | 71 (22%)               | 31 (34%)                  | 0.015   |
| Cyclosporin          | 72 (17%)             | 57 (17%)               | 15 (16%)                  | 0.832   |
| Tofacitinib          | 50 (12%)             | 31 (9.5%)              | 19 (21%)                  | 0.003   |
| Treatment            |                      |                        |                           | 0.635   |
| Corticosteroid alone | 52 (12%)             | 42 (13%)               | 10 (11%)                  |         |
| Combined therapy     | 366 (88%)            | 285 (87%)              | 81 (89%)                  |         |

Note: Data are given as n (%). IVIG, intravenous immunogloblin; IVCY, intravenous cyclophosphamide.

**Table S2.** Patient Characteristics after imputation of missing values.

| Characteristic                      | Overall<br>(N = 418) | Development<br>(N = 282) | Validation<br>(N = 136) | P value |
|-------------------------------------|----------------------|--------------------------|-------------------------|---------|
| Age                                 | 56.0 (50.0-65.8)     | 55.5 (50.0-66.0)         | 56.0 (50.0-65.0)        | 0.496   |
| Gender                              |                      |                          |                         | 0.811   |
| Female                              | 264 (63%)            | 177 (63%)                | 87 (64%)                |         |
| Male                                | 154 (37%)            | 105 (37%)                | 49 (36%)                |         |
| Smoke                               | 99 (24%)             | 73 (26%)                 | 26 (19%)                | 0.127   |
| Cough                               | 350 (84%)            | 234 (83%)                | 116 (85%)               | 0.548   |
| Breathless                          | 375 (90%)            | 252 (89%)                | 123 (90%)               | 0.734   |
| Fever                               |                      |                          |                         | 0.404   |
| Absent                              | 288 (69%)            | 198 (70%)                | 90 (66%)                |         |
| Present                             | 130 (31%)            | 84 (30%)                 | 46 (34%)                |         |
| Heliotrope sign                     |                      |                          |                         | 0.058   |
| Absent                              | 355 (85%)            | 233 (83%)                | 122 (90%)               |         |
| Present                             | 63 (15%)             | 49 (17%)                 | 14 (10%)                |         |
| Gotttron sign                       |                      |                          |                         | 0.434   |
| Absent                              | 219 (52%)            | 144 (51%)                | 75 (55%)                |         |
| Present                             | 199 (48%)            | 138 (49%)                | 61 (45%)                |         |
| Myasthenia                          |                      |                          |                         | 0.600   |
| Absent                              | 335 (80%)            | 224 (79%)                | 111 (82%)               |         |
| Present                             | 83 (20%)             | 58 (21%)                 | 25 (18%)                |         |
| Arthralgia                          |                      |                          |                         | 0.135   |
| Absent                              | 326 (78%)            | 214 (76%)                | 112 (82%)               |         |
| Present                             | 92 (22%)             | 68 (24%)                 | 24 (18%)                |         |
| HRCT                                |                      |                          |                         | 0.258   |
| NSIP                                | 156 (37%)            | 100 (35%)                | 56 (41%)                |         |
| OP or UIP                           | 262 (63%)            | 182 (65%)                | 80 (59%)                |         |
| MDA5                                |                      |                          |                         | 0.228   |
| Negative                            | 272 (65%)            | 178 (63%)                | 94 (69%)                |         |
| Positive                            | 146 (35%)            | 104 (37%)                | 42 (31%)                |         |
| RO52                                |                      |                          |                         | 0.072   |
| Negative                            | 161 (39%)            | 117 (41%)                | 44 (32%)                |         |
| Positive                            | 257 (61%)            | 165 (59%)                | 92 (68%)                |         |
| WBC                                 | 7.4 (5.4-10.0)       | 7.2 (5.4-10.0)           | 7.7 (5.4-10.0)          | 0.724   |
| PLT                                 | 226.5 (173.0-285.8)  | 227.0 (173.3-295.3)      | 226.0 (172.0-276.8)     | 0.467   |
| Lymphocyte                          | 1.1 (0.8-1.7)        | 1.2 (0.7-1.7)            | 1.1 (0.8-1.7)           | 0.840   |
| CD3 <sup>+</sup> CD4 <sup>+</sup> T | 0.4 (0.2-0.6)        | 0.4 (0.2-0.6)            | 0.3 (0.2-0.5)           | 0.132   |
| LDH                                 | 299.0 (237.0-429.0)  | 293.5 (233.3-409.0)      | 320.5 (246.5-439.3)     | 0.069   |
| CRP                                 | 6.7 (3.8-21.4)       | 6.7 (3.8-20.7)           | 6.7 (3.9-21.6)          | 0.805   |

|                  |                     |                     |                     |       |
|------------------|---------------------|---------------------|---------------------|-------|
| <b>IgG</b>       | 11.9 (9.6-14.7)     | 12.3 (9.7-14.8)     | 11.3 (9.2-14.5)     | 0.083 |
| <b>ESR</b>       | 27.5 (16.0-44.0)    | 28.0 (16.0-45.8)    | 26.0 (13.0-41.5)    | 0.158 |
| <b>CK</b>        | 49.0 (30.0-101.8)   | 46.5 (30.0-93.5)    | 55.0 (32.8-123.8)   | 0.142 |
| <b>FVC%</b>      | 61.1 (49.5-71.0)    | 61.2 (50.8-71.2)    | 59.1 (46.3-68.7)    | 0.141 |
| <b>FEV1%</b>     | 67.5 (55.9-76.1)    | 67.7 (56.3-75.8)    | 67.1 (54.6-76.9)    | 0.552 |
| <b>DLCO%</b>     | 50.3 (41.0-64.6)    | 50.6 (41.9-65.1)    | 50.1 (39.8-63.2)    | 0.391 |
| <b>PO2</b>       | 73.0 (64.0-85.0)    | 73.0 (64.0-86.0)    | 71.5 (63.8-82.8)    | 0.459 |
| <b>PCO2</b>      | 35.3 (32.7-39.7)    | 35.5 (33.0-39.6)    | 35.1 (32.1-39.8)    | 0.621 |
| <b>PaO2/FiO2</b> | 310.0 (220.3-376.0) | 319.0 (221.0-380.0) | 305.0 (218.8-376.0) | 0.249 |

Note: Data are given as median (IQR) or n (%). A Gottron’s sign and inverse Gottron’s sign were pooled in data collection. Abbreviations: WBC, white blood counts; PLT, platelets; LDH, lactate CT, CRP, C-reactive protein; IgG, immunoglobulin G; computed tomography; ESR, Erythrocyte Sedimentation Rate; CK, creatine kinase; FVC%, forced vital capacity predicted; DLCO%, diffusing capacity of the lung for carbon monoxide predicted; FiO2, fraction of inspiration O2; MDA5, melanoma differentiation-associated gene 5; HRCT, high-resolution computed tomography; NSIP, nonspecific interstitial pneumonia; OP, organizing pneumonia; UIP, usual interstitial pneumonitis.

**Table S3.** Univariate and multivariate associations between fifteen candidates markers and rapid progression in patients with PM/DM-ILD.

| Variable                            | Univariate Logistic Regression |         | Multivariate Logistic Regression* |         |
|-------------------------------------|--------------------------------|---------|-----------------------------------|---------|
|                                     | OR (95% CI)                    | P value | OR (95% CI)                       | P value |
| WBC                                 | 1.01 (0.98-1.05)               | 0.532   | -                                 | -       |
| PLT                                 | 1.00 (1.00-1.00)               | 0.420   | -                                 | -       |
| Lymphocyte                          | 0.26 (0.14-0.46)               | <0.001  | -                                 | -       |
| CD3 <sup>+</sup> CD4 <sup>+</sup> T | 0.01 (0.00-0.07)               | <0.001  | 0.09 (0.02-0.48)                  | 0.005   |
| LDH                                 | 1.00 (1.00-1.00)               | <0.001  | 1.00 (1.00-1.00)                  | 0.013   |
| CRP                                 | 1.03 (1.01-1.04)               | <0.001  | 1.01 (1.00-1.03)                  | 0.071   |
| IgG                                 | 0.99 (0.93-1.06)               | 0.792   | -                                 | -       |
| ESR                                 | 1.02 (1.01-1.03)               | 0.001   | -                                 | -       |
| CK                                  | 1.00 (1.00-1.00)               | 0.159   | 1.00 (1.00-1.00)                  | 0.056   |
| FVC%                                | 0.96 (0.92-1.00)               | 0.035   | -                                 | -       |
| FEV1%                               | 0.97 (0.93-1.01)               | 0.186   | -                                 | -       |
| DLCO%                               | 0.98 (0.94-1.01)               | 0.138   | -                                 | -       |
| PO <sub>2</sub>                     | 0.95 (0.94-0.97)               | <0.001  | -                                 | -       |
| PCO <sub>2</sub>                    | 0.87 (0.81-0.93)               | <0.001  | -                                 | -       |
| PaO <sub>2</sub> /FiO <sub>2</sub>  | 0.99 (0.98-0.99)               | <0.001  | 0.99 (0.99-1.00)                  | <0.001  |

**Notes:** A stepwise multivariate logistic regression model guided by Akaike’s information criterion (AIC) as the stopping criterion was conducted and the results of final multivariate logistic regression model were given.  
**Abbreviations:** PM/DM-ILD, polymyositis/dermatomyositis-associated interstitial lung disease; WBC, white blood counts; PLT, platelets; LDH, lactate dehydrogenase; CRP, C-reactive protein; IgG, immunoglobulin G; ESR, Erythrocyte Sedimentation Rate; CK, creatine kinase; FVC%, forced vital capacity predicted; DLCO%, diffusing capacity of the lung for carbon monoxide predicted; FiO<sub>2</sub>, fraction of inspiration O<sub>2</sub>.

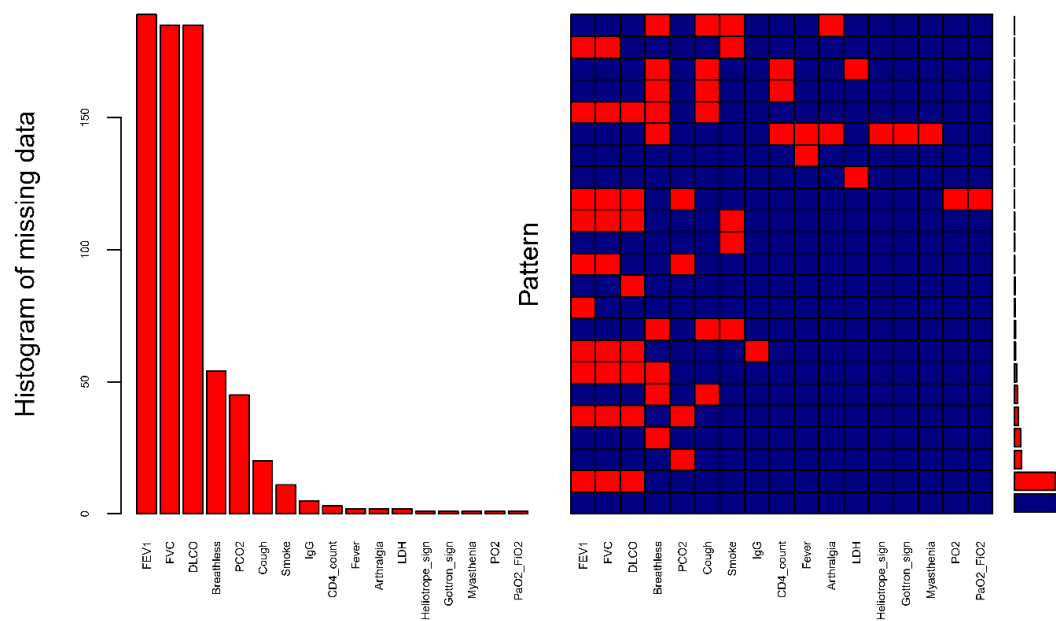

**Figure S1.** The pattern of missing values.

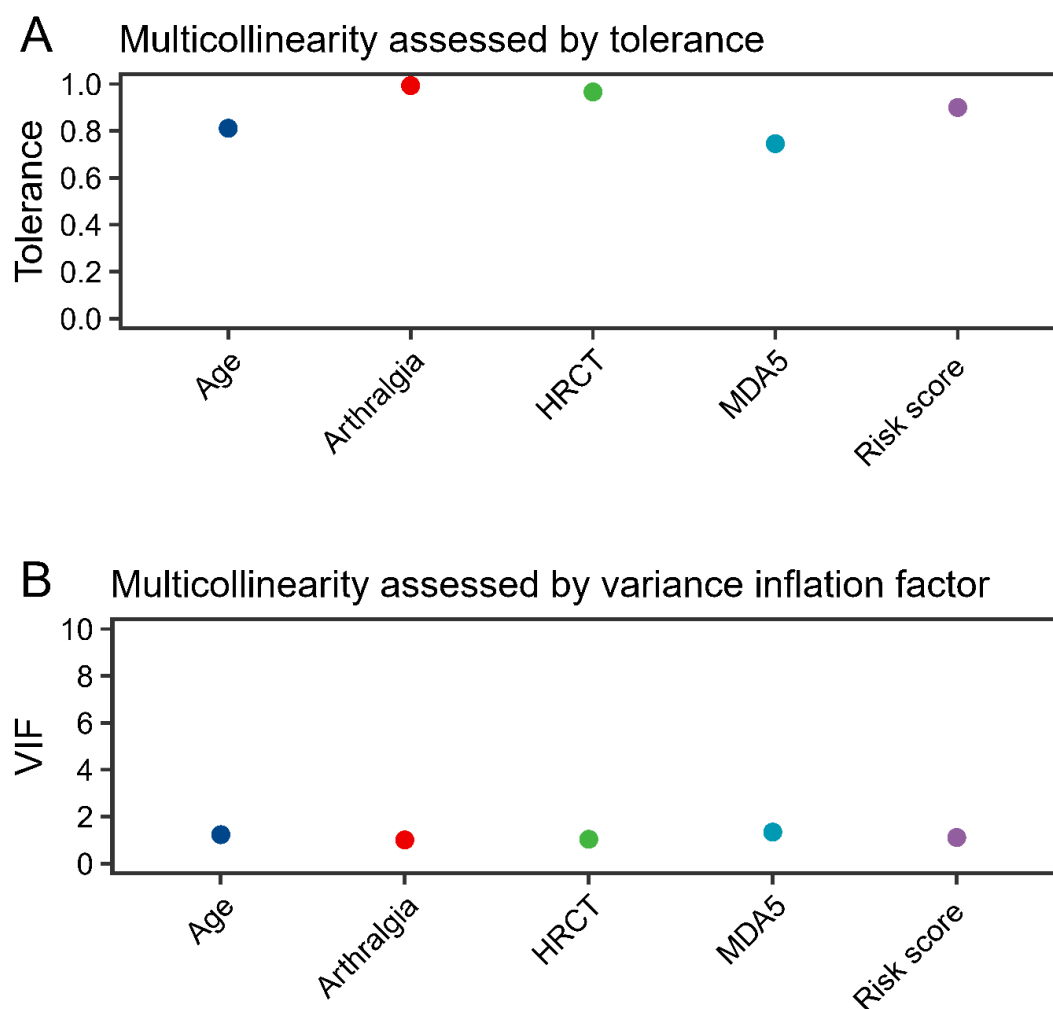

**Figure S2.** The multicollinearity of final model was assessed by tolerance (A) and variance inflation factor (B).

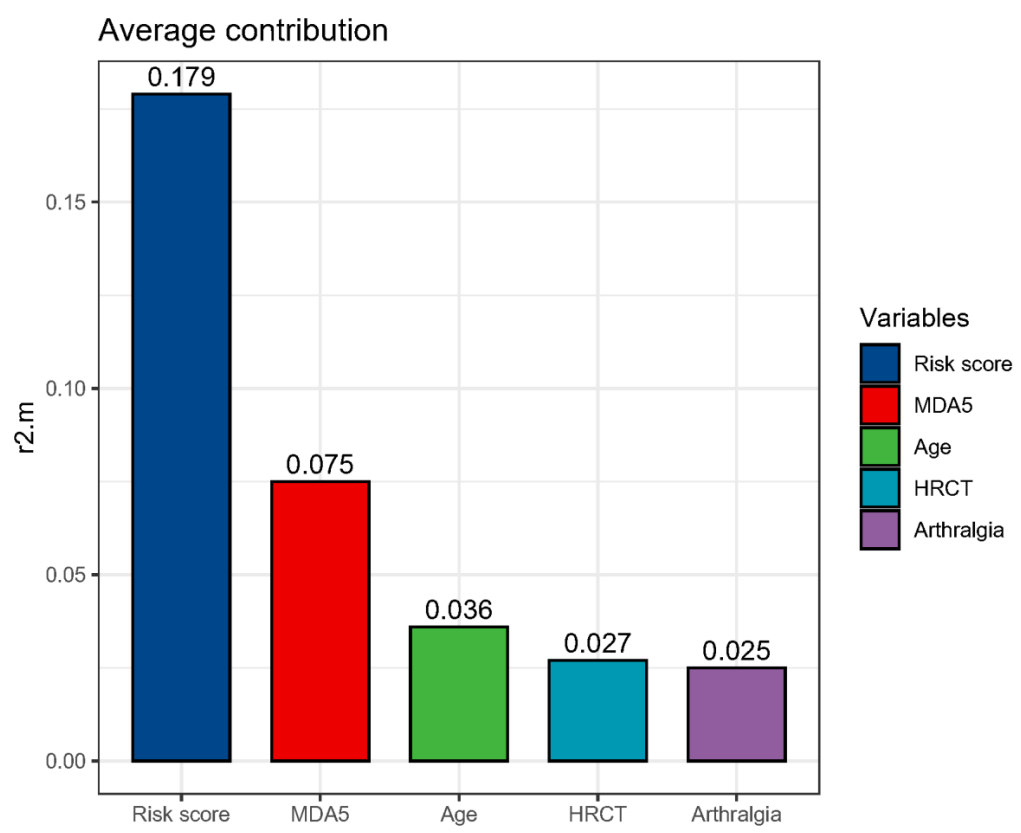

**Figure S3.** Dominance analysis assessed the relative importance of each independent predictor within the prediction model.



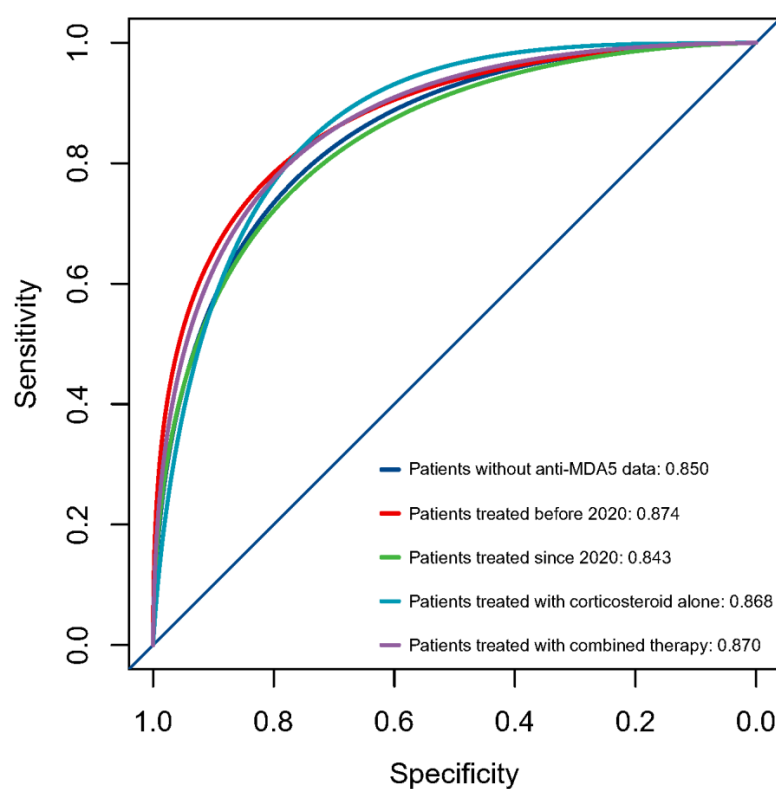

**Figure S4.** Sensitivity analyses verify the model's robustness.

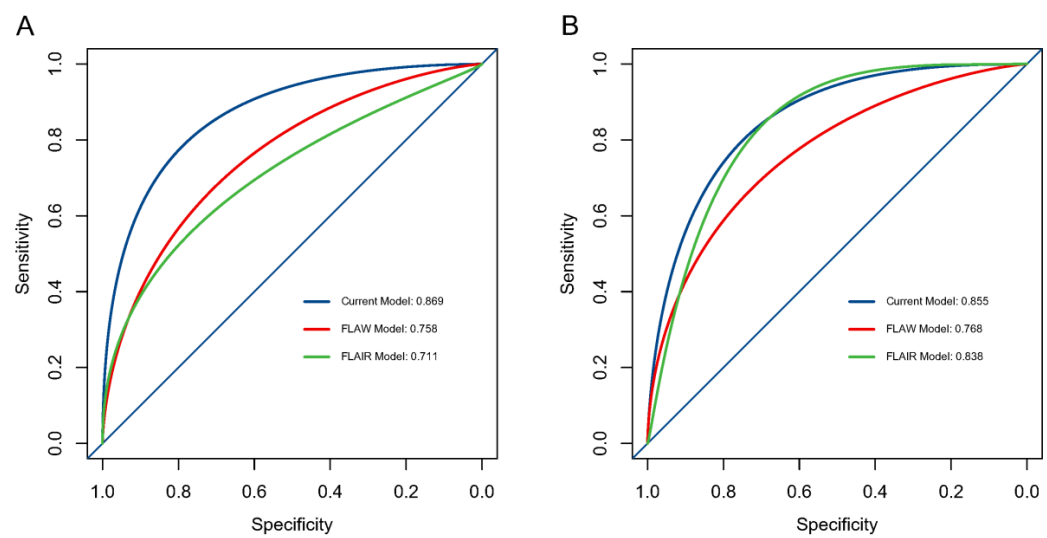

**Figure S5.** Comparative assessments against previous models.
